# Supplementary material for: MOF Template-Derived Carbon Shell-Embedded CoP Hierarchical Nanosheet as Bifunctional Catalyst for Overall Water Splitting
Source: MDPI journal article supplement (doi:10.3390/nano13172421), 2023-08-25
Supplement: s1 [file s1]

## Supporting Information

### **MOF Template-Derived Carbon Shell Embedded CoP Hierarchical Nanosheet as Bifunctional Catalyst for Overall Water Splitting**

Meijun Liu<sup>a,b</sup>, Fuhao Yang<sup>a</sup>, Jicheng Mei<sup>a,b</sup>, Xu Guo<sup>a</sup>, Huayang Wang<sup>a</sup>, Mengyao He<sup>a</sup>,  
Yuang Yao<sup>a</sup>, Haifeng Zhang<sup>a,\*</sup>, Chengbin Liu<sup>b,\*</sup>

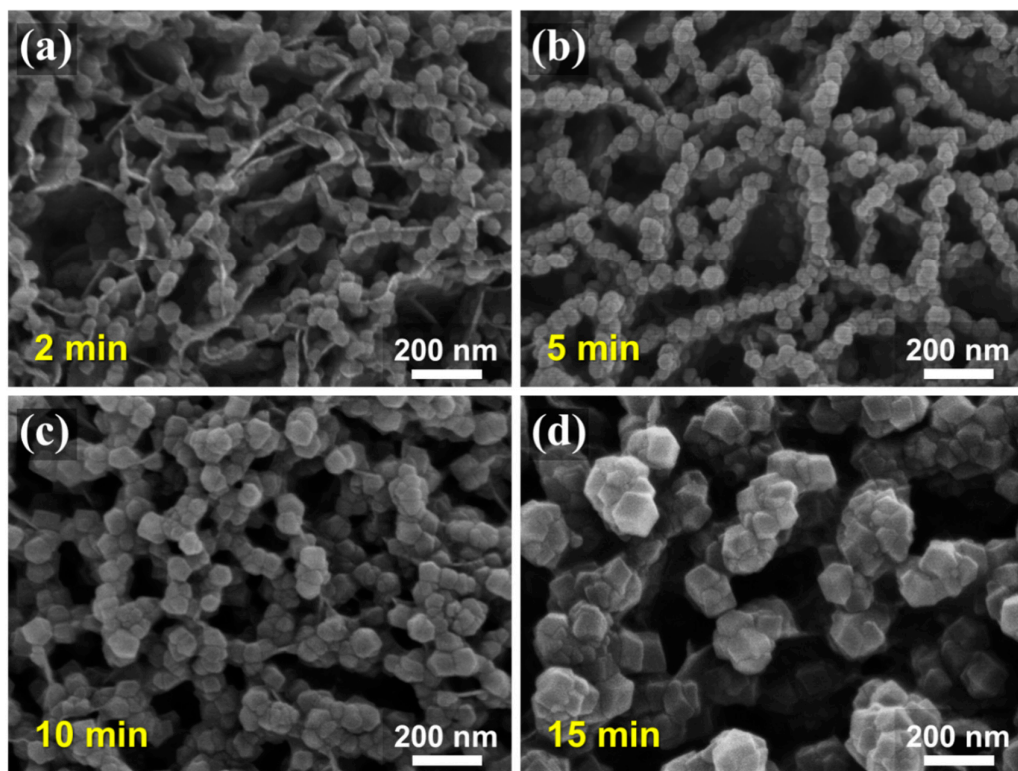

**Figure S1.** SEM images of ZIF-67 crystals grown on Co(OH)<sub>2</sub> nanosheets for (a) 2 min, (b) 5 min, (c) 10 min and (d) 15 min.

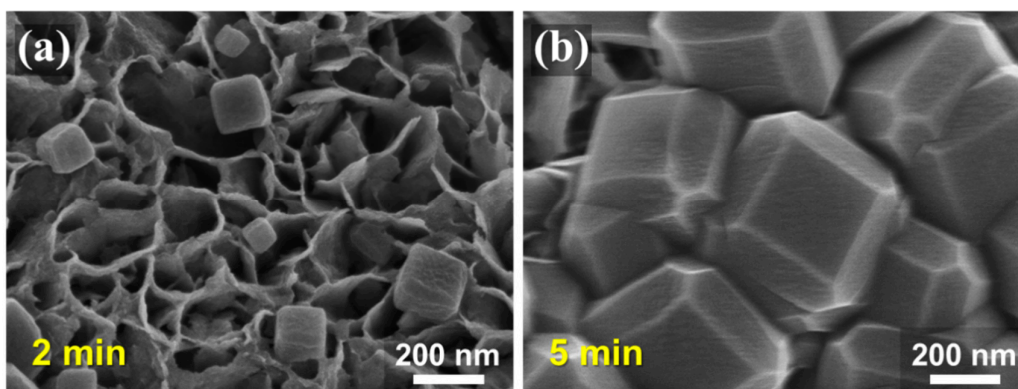

**Figure S2.** SEM images of ZIF-67 crystals grown on Co(OH)<sub>2</sub> nanosheets for (a) 2 min and (b) 5 min without the acceleration of TEA.

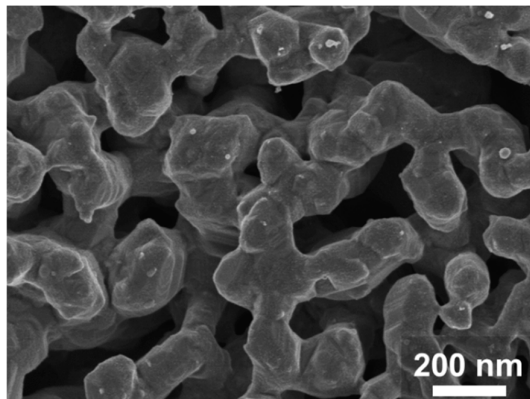

**Figure S3.** SEM image of ZIF-67@Co(OH)<sub>2</sub>-C prepared by directly pyrolytic carbonization of ZIF-67@Co(OH)<sub>2</sub>.

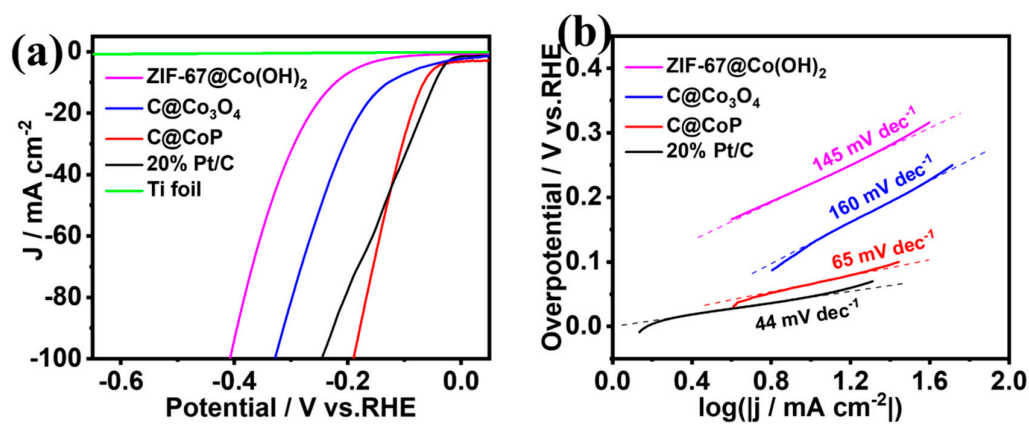

**Figure S4.** (a) HER Polarization curves and corresponding (b) Tafel plots for C@CoP and reference materials.

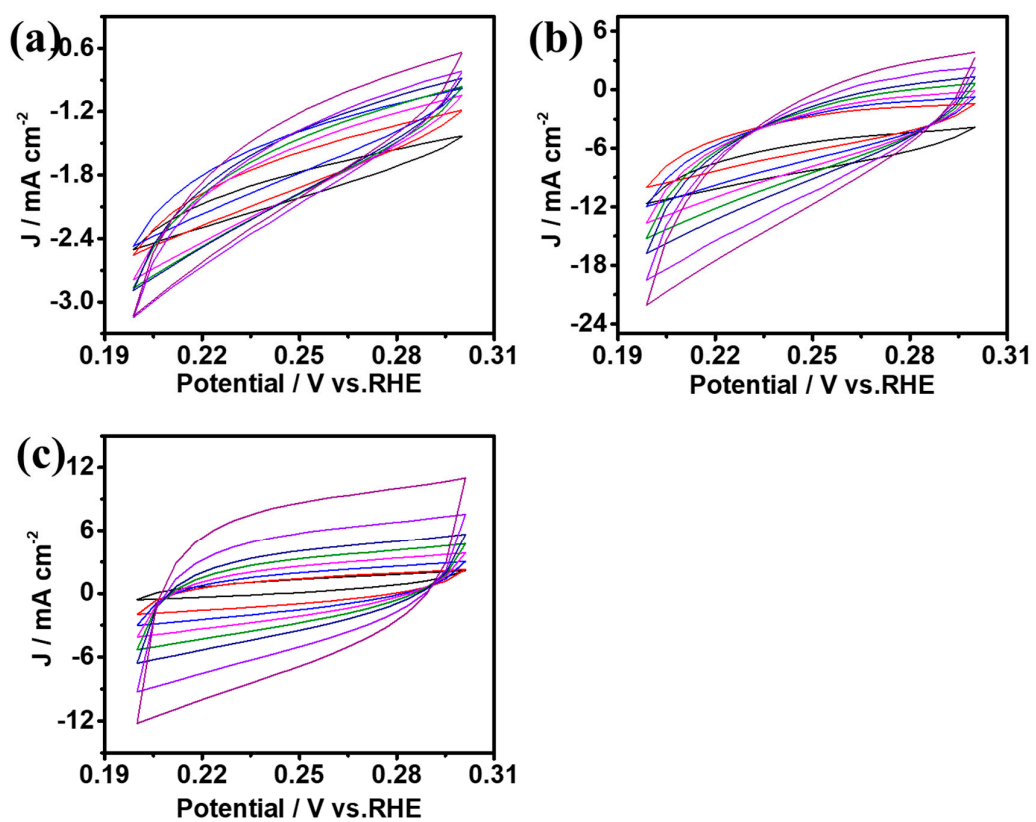

**Figure S5.** CV curves of (a) C@Co<sub>3</sub>O<sub>4</sub>, (b) CoP and (c) C@CoP in the range of 0.2–0.3 V vs. RHE. The curves from inside to outside correspond to the scanning rate of 10, 20, 30, 40, 50, 60, 80 and 100 mV s<sup>-1</sup>, respectively.

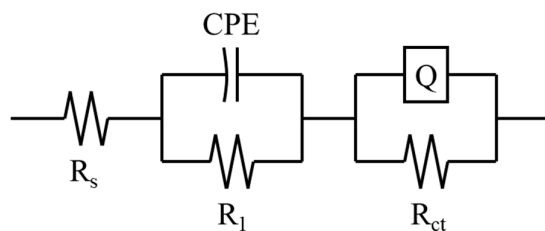

**Figure S6.** Equivalent circuit fitted according to the Nyquist diagram in Figure 5d and Figure 6d.

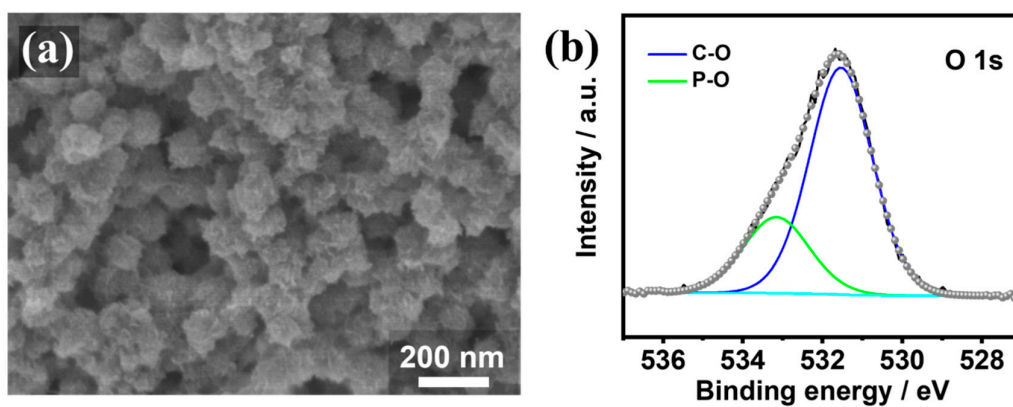

**Figure S7.** (a) SEM image and (b) high-resolution XPS spectra of O 1s of C@CoP after long term HER test.

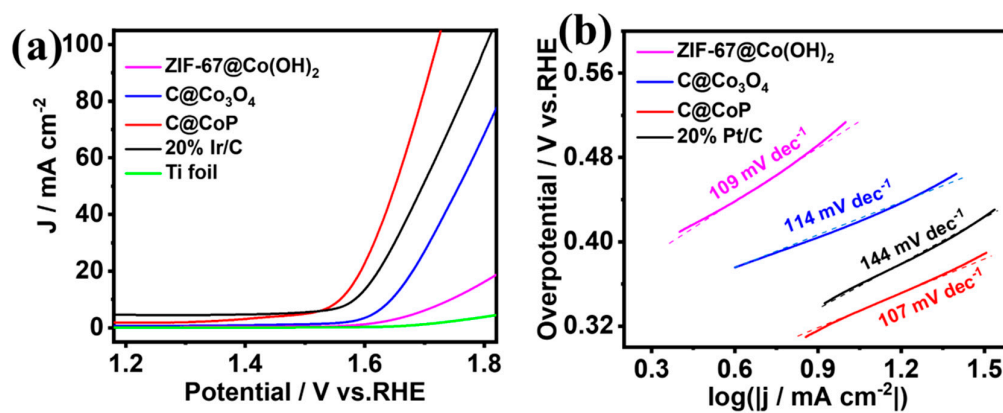

**Figure S8.** (a) OER Polarization curves and corresponding (b) Tafel plots for C@CoP and reference materials.

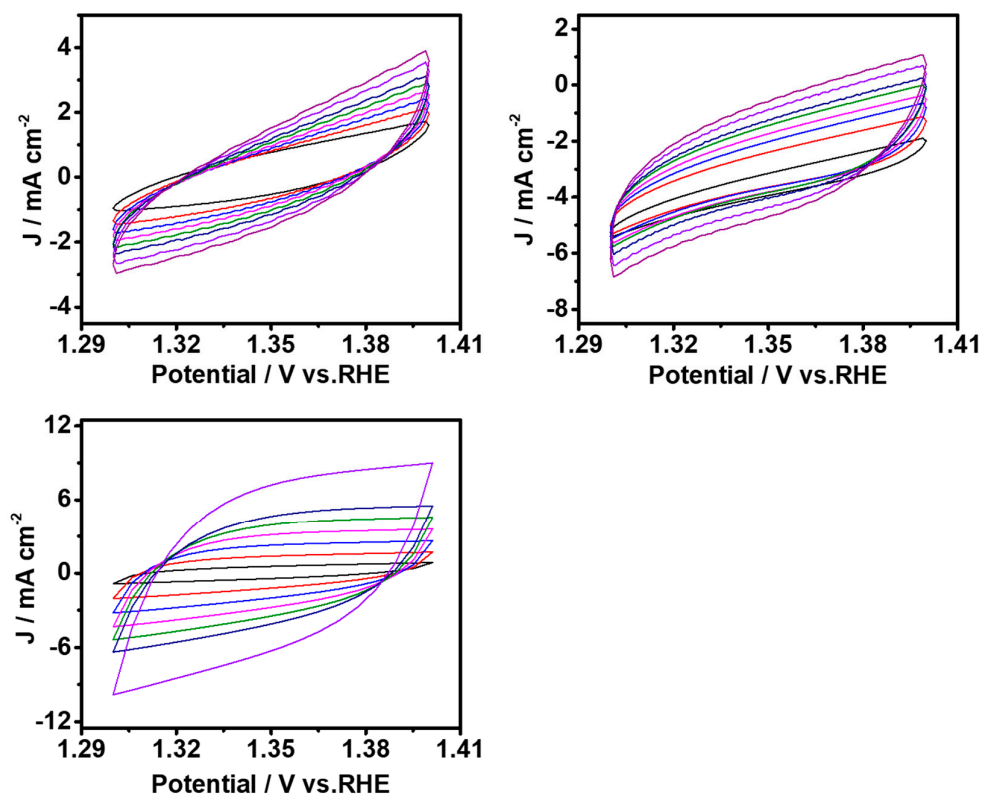

**Figure S9.** CV curves of (a) C@Co<sub>3</sub>O<sub>4</sub>, (b) CoP and (c) C@CoP in the range of 1.3–1.4 V vs.RHE. The curves from inside to outside correspond to the scanning rate of 10, 20, 30, 40, 50, 60, 80 and 100 mV s<sup>-1</sup>, respectively.

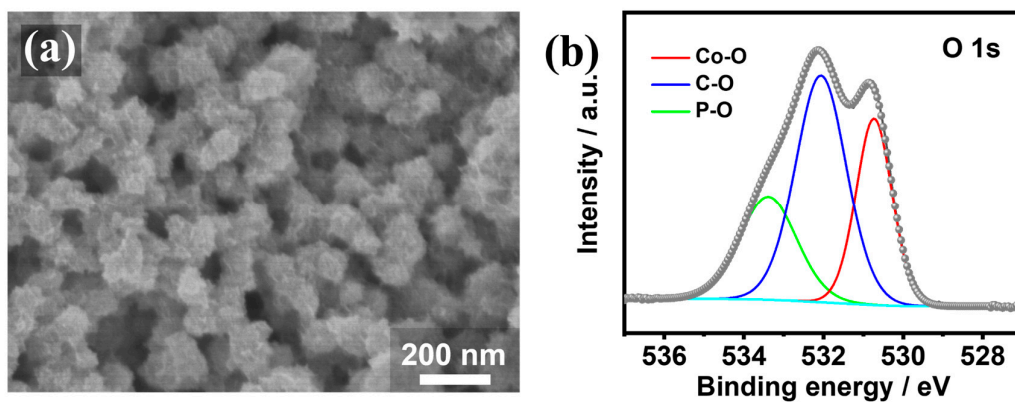

**Figure S10.** (a) SEM image and (b) high-resolution XPS spectra of O 1s of C@CoP after long term OER test.



**Table S1.** Comparison of HER performance for C@CoP with other HER electrocatalysts

| Catalyst                                               | Overpotential<br>(mV) at<br>10 mA/cm <sup>2</sup> | Tafel<br>slope<br>(mV/dec) | Electrolyte                          | Reference |
|--------------------------------------------------------|---------------------------------------------------|----------------------------|--------------------------------------|-----------|
| C@CoP                                                  | 72                                                | 65                         | 1.0 M KOH                            | This work |
| Ni-CoP/HPFs                                            | 144                                               | 62                         | 0.5 M H <sub>2</sub> SO <sub>4</sub> | 1         |
|                                                        | 92                                                | 34                         | 1.0 M KOH                            |           |
| Mn <sub>2</sub> P-Mn <sub>2</sub> O <sub>3</sub> /PNCF | 98                                                | 46                         | 1.0 M KOH                            | 2         |
| FePx/ Fe-N-C /NPC                                      | 75                                                | 60                         | 0.5 M H <sub>2</sub> SO <sub>4</sub> | 3         |
|                                                        | 182                                               | 132                        | 1.0 M KOH                            |           |
| CoP/Co-MOF                                             | 27                                                | 43                         | 0.5 M H <sub>2</sub> SO <sub>4</sub> | 4         |
|                                                        | 34                                                | 56                         | 1.0 M KOH                            |           |
|                                                        | 49                                                | 63                         | 1.0M PBS                             |           |
| PMA@ZIF-67-C-AT                                        | 570                                               | 222                        | 0.2M PBS                             | 5         |
| Co <sub>5</sub> Fe <sub>5</sub> -C                     | 165                                               | 70.7                       | 1.0 M KOH                            | 6         |
| V-CoP <sub>2</sub> /CC                                 | 50                                                | 32                         | 0.5 M H <sub>2</sub> SO <sub>4</sub> | 7         |
| VCoCOx@NF                                              | 63                                                | 93                         | 1.0 M KOH                            | 8         |
| Co <sub>2</sub> P/CoP@Co@NCNT                          | 118                                               | 46                         | 1.0 M KOH                            | 9         |
|                                                        | 136                                               | 49                         | 0.5 M H <sub>2</sub> SO <sub>4</sub> |           |



**Table S2.** Electrochemical impedance parameters obtained by fitting the Nyquist plots of Figure 5d to the equivalent circuit model

| Catalyst                         | $R_s$<br>( $\Omega$ ) | C<br>(mF cm <sup>-2</sup> ) | $R_1$<br>( $\Omega$ ) | Q                     |       | $R_{ct}$<br>( $\Omega$ ) |
|----------------------------------|-----------------------|-----------------------------|-----------------------|-----------------------|-------|--------------------------|
|                                  |                       |                             |                       | $Y_1(\Omega^{-1}s^n)$ | n     |                          |
| C@CoP                            | 1.01                  | 3.89                        | 4.30                  | $2.56 \times 10^{-3}$ | 0.480 | 4.30                     |
| CoP                              | 1.17                  | 5.43                        | 5.43                  | $5.03 \times 10^{-3}$ | 0.254 | 5.43                     |
| C@Co <sub>3</sub> O <sub>4</sub> | 1.22                  | 0.966                       | 22.40                 | $5.98 \times 10^{-3}$ | 0.872 | 22.40                    |

**Table S3.** Comparison of OER performance of C@CoP with other reported electrocatalysts.

| Catalyst                                                              | Overpotential<br>(mV) at<br>10 mA/cm <sup>2</sup> | Tafel<br>slope<br>(mV/dec) | Electrolyte                          | Reference     |
|-----------------------------------------------------------------------|---------------------------------------------------|----------------------------|--------------------------------------|---------------|
| <b>C@CoP</b>                                                          | 329                                               | 107                        | 1.0 M KOH                            | This work     |
| <b>Co<sub>5</sub>Fe<sub>5</sub>-C</b>                                 | 245                                               | 58.2                       | 1.0 M KOH                            | <sup>6</sup>  |
| <b>W<sub>0.2</sub>Er<sub>0.1</sub>Ru<sub>0.7</sub>O<sub>2-δ</sub></b> | 168                                               | 66.8                       | 0.5M H <sub>2</sub> SO <sub>4</sub>  | <sup>10</sup> |
| <b>np-Ir/NiFeO</b>                                                    | 197                                               | 29.6                       | 1.0 M KOH                            | <sup>11</sup> |
| <b>Mn<sub>2</sub>P-Mn<sub>2</sub>O<sub>3</sub>/PNCf</b>               | 370                                               | 86                         | 1.0 M KOH                            | <sup>2</sup>  |
| <b>FePx/ Fe-N-C /NPC</b>                                              | 325                                               | 79                         | 1.0 M KOH                            | <sup>3</sup>  |
| <b>NiMoP@NiFe-LDH</b>                                                 | 299                                               | 23.3                       | 1.0 M KOH                            | <sup>12</sup> |
| <b>V-CoP<sub>2</sub>/CC</b>                                           | 91                                                | 40                         | 0.5 M H <sub>2</sub> SO <sub>4</sub> | <sup>7</sup>  |
| <b>VCoCO<sub>x</sub>@NF</b>                                           | 240                                               | 65                         | 1.0 M KOH                            | <sup>8</sup>  |
| <b>Co<sub>2</sub>P/CoP@Co@NCNT</b>                                    | 256                                               | 46                         | 1.0 M KOH                            | <sup>9</sup>  |

**Table S4.** Electrochemical impedance parameters obtained by fitting the Nyquist plots

of Figure 6d to the equivalent circuit model

| Catalyst | $R_s$<br>( $\Omega$ ) | C<br>(mF cm <sup>-2</sup> ) | $R_1$<br>( $\Omega$ ) | Q                     |       | $R_{ct}$<br>( $\Omega$ ) |
|----------|-----------------------|-----------------------------|-----------------------|-----------------------|-------|--------------------------|
|          |                       |                             |                       | $Y_1(\Omega^{-1}s^n)$ | n     |                          |
| C@CoP    | 2.17                  | 4.90                        | 9.66                  | $6.75 \times 10^{-3}$ | 0.604 | 0.59                     |
| CoP      | 2.68                  | 6.75                        | 8.55                  | $4.45 \times 10^{-3}$ | 0.968 | 3.81                     |

**Table S5.** Comparison of overall water splitting performance of C@CoP with recent representative works.

| Catalyst                                               | Cell voltage<br>(V) at<br>10 mA/cm <sup>2</sup> | Electrolyte | Reference     |
|--------------------------------------------------------|-------------------------------------------------|-------------|---------------|
| C@CoP                                                  | 1.63                                            | 1.0 M KOH   | This work     |
| Mn <sub>2</sub> P-Mn <sub>2</sub> O <sub>3</sub> /PNCf | 1.6                                             | 1.0 M KOH   | <sup>2</sup>  |
| FePx/ Fe-N-C /NPC                                      | 1.58                                            | 1.0 M KOH   | <sup>3</sup>  |
| Ir <sub>1</sub> @Co/NC                                 | 1.603                                           | 1.0 M KOH   | <sup>13</sup> |
| Co-Fe NPs                                              | 1.92                                            | 1.0 M KOH   | <sup>14</sup> |
| Fe-NiS <sub>2</sub> /CF                                | 1.722                                           | 1.0 M KOH   | <sup>15</sup> |
| O-Ni <sub>0.5</sub> W <sub>0.5</sub> Se <sub>2</sub>   | 1.56                                            | 1.0 M KOH   | <sup>16</sup> |
| Co <sub>0.75</sub> Fe <sub>0.25</sub> P                | 1.63                                            | 1.0 M KOH   | <sup>17</sup> |
| Co <sub>2</sub> P/CoP@Co@NCNT                          | 1.6                                             | 1.0 M KOH   | <sup>9</sup>  |
| Co/Mo <sub>2</sub> C@NC800-2                           | 1.67                                            | 1.0 M KOH   | <sup>18</sup> |

1. Pan, Y.; Sun, K.; Lin, Y.; Cao, X.; Cheng, Y.; Liu, S.; Zeng, L.; Cheong, W.-C.; Zhao, D.; Wu, K.; Liu, Z.; Liu, Y.; Wang, D.; Peng, Q.; Chen, C.; Li, Y., Electronic structure and d-band center control engineering over M-doped CoP (M = Ni, Mn, Fe) hollow polyhedron frames for boosting hydrogen production. *Nano Energy* **2019**, *56*, 411-419.
2. Wang, X.; Huang, G.; Pan, Z.; Kang, S.; Ma, S.; Shen, P. K.; Zhu, J., One-pot synthesis of Mn<sub>2</sub>P-Mn<sub>2</sub>O<sub>3</sub> heterogeneous nanoparticles in a P, N -doped three-dimensional porous carbon framework as a highly efficient bifunctional electrocatalyst for overall water splitting. *Chemical Engineering Journal* **2022**, *428*.
3. Qin, Q.; Jang, H.; Li, P.; Yuan, B.; Liu, X.; Cho, J., A Tannic Acid-Derived N-, P-Codoped Carbon-Supported Iron-Based Nanocomposite as an Advanced Trifunctional Electrocatalyst for the Overall Water Splitting Cells and Zinc-Air Batteries. *Advanced Energy Materials* **2019**, *9* (5).
4. Liu, T.; Li, P.; Yao, N.; Cheng, G.; Chen, S.; Luo, W.; Yin, Y., CoP-Doped MOF-Based Electrocatalyst for pH-Universal Hydrogen Evolution Reaction. *Angew Chem Int Ed Engl* **2019**, *58* (14), 4679-4684.
5. Zhao, X.; Zhang, Q.; Huang, X.; Ding, L.; Yang, W.; Wang, C.; Pan, Q., Polyoxometalate@ZIF-67 derived carbon-based catalyst for efficient electrochemical overall seawater splitting and oxygen reduction. *International Journal of Hydrogen Energy* **2022**, *47* (4), 2178-2186.
6. Yan, Y.; Han, Y.; Wang, F.; Hu, Y.; Shi, Q.; Diao, G.; Chen, M., Bifunctional electrocatalyst of Co<sub>x</sub>Fe<sub>y</sub>-C for overall water splitting. *Journal of Alloys and Compounds* **2022**, *897*.
7. Wang, Y.; Jiao, Y.; Yan, H.; Yang, G.; Tian, C.; Wu, A.; Liu, Y.; Fu, H., Vanadium-Incorporated CoP(2) with Lattice Expansion for Highly Efficient Acidic Overall Water Splitting. *Angew Chem Int Ed Engl* **2022**, *61* (12), e202116233.
8. Meena, A.; Thangavel, P.; Nissimagoudar, A. S.; Narayan Singh, A.; Jana, A.; Sol Jeong, D.; Im, H.; Kim, K. S., Bifunctional oxovanadate doped cobalt carbonate for high-efficient overall water splitting in alkaline-anion-exchange-membrane water-electrolyzer. *Chemical Engineering Journal* **2022**, *430*.
9. Lu, Z.; Cao, Y.; Xie, J.; Hu, J.; Wang, K.; Jia, D., Construction of Co<sub>2</sub>P/CoP@Co@NCNT rich-interface to synergistically promote overall water splitting. *Chemical Engineering Journal* **2022**, *430*.
10. Hao, S.; Liu, M.; Pan, J.; Liu, X.; Tan, X.; Xu, N.; He, Y.; Lei, L.; Zhang, X., Dopants fixation of Ruthenium for boosting acidic oxygen evolution stability and activity. *Nature Communications* **2020**, *11* (1), 5368.
11. Jiang, K.; Luo, M.; Peng, M.; Yu, Y.; Lu, Y. R.; Chan, T. S.; Liu, P.; de Groot, F. M. F.; Tan, Y., Dynamic active-site generation of atomic iridium stabilized on nanoporous metal phosphides for water oxidation. *Nat Commun* **2020**, *11* (1), 2701.
12. Xiao, L.; Bao, W.; Zhang, J.; Yang, C.; Ai, T.; Li, Y.; Wei, X.; Jiang, P.; Kou, L., Interfacial interaction between NiMoP and NiFe-LDH to regulate the electronic structure toward high-efficiency electrocatalytic oxygen evolution reaction. *International Journal of Hydrogen Energy* **2022**, *47* (15), 9230-9238.
13. Lai, W.-H.; Zhang, L.-F.; Hua, W.-B.; Indris, S.; Yan, Z.-C.; Hu, Z.; Zhang, B.; Liu, Y.; Wang, L.; Liu, M.; Liu, R.; Wang, Y.-X.; Wang, J.-Z.; Hu, Z.; Liu, H.-K.; Chou, S.-L.; Dou,

S.-X., General  $\pi$ -Electron-Assisted Strategy for Ir, Pt, Ru, Pd, Fe, Ni Single-Atom Electrocatalysts with Bifunctional Active Sites for Highly Efficient Water Splitting. *Angewandte Chemie International Edition* **2019**, *58* (34), 11868-11873.

14. Adamson, W.; Bo, X.; Li, Y.; Suryanto, B. H. R.; Chen, X.; Zhao, C., Co-Fe binary metal oxide electrocatalyst with synergistic interface structures for efficient overall water splitting. *Catalysis Today* **2020**, *351*, 44-49.

15. Yu, C.; Huang, H.; Zhou, S.; Han, X.; Zhao, C.; Yang, J.; Li, S.; Guo, W.; An, B.; Zhao, J.; Qiu, J., An electrocatalyst with anti-oxidized capability for overall water splitting. *Nano Research* **2018**, *11* (6), 3411-3418.

16. Singh, M.; Nguyen, T. T.; Balamurugan, J.; Kim, N. H.; Lee, J. H., Rational manipulation of 3D hierarchical oxygenated nickel tungsten selenide nanosheet as the efficient bifunctional electrocatalyst for overall water splitting. *Chemical Engineering Journal* **2022**, *430*.

17. Huang, Y.; Li, M.; Yang, W.; Yu, Y.; Hao, S., 3D ordered mesoporous cobalt ferrite phosphides for overall water splitting. *Science China Materials* **2020**, *63* (2), 240-248.

18. Liu, G.; Wang, K.; Wang, L.; Wang, B.; Lin, Z.; Chen, X.; Hua, Y.; Zhu, W.; Li, H.; Xia, J., A Janus cobalt nanoparticles and molybdenum carbide decorated N-doped carbon for high-performance overall water splitting. *Journal of Colloid and Interface Science* **2021**, *583*, 614-625.
